# Supplementary material
Source: publisher figshare collection journal article supplement (https://gsajournals.figshare.com/ndownloader/files/20411322)
Supplement: Supplementary file 1 [file 20411322]

| Sex | Diet | CTRL-KD  (days) | Spen-KD  (days) | % difference lifespan b/w genotypes | CTRL-KD|EXP  vs MYD | Spen-KD|EXP  vs MYD |
| --- | --- | --- | --- | --- | --- | --- |
| Female | MYD | 68 | 37 | 83.8 | 0 | 0 |
| HYD | 71.5 | 31 | 130.6 | 5.14705882 | -16.216216 |
| HSD | 67 | 43 | 55.8 | -1.4705882 | 16.2162162 |
| HFD | 2 | 6 | -66.7 | -97.058824 | -83.783784 |
| Male | MYD | 48.5 | 50 | -3.0 | 0 | 0 |
| HYD | 45 | 42 | 7.1 | -7.2164948 | -16 |
| HSD | 55 | 50 | 10.0 | 13.4020619 | 0 |
| HFD | 18 | 11 | 63.6 | -62.886598 | -78 |

**Supplemental Table 1**: Longevity of male and mated female adults on diets. Percentage difference between the median days lived. n=3. Medium-Yeast Diet (MYD), Experimental Diet (EXP): High-yeast diet (HYD), High-sugar diet (HSD), High-fat diet (HFD).
